# Supplementary material for: Streamlined Fabrication of Hybrid Lipid Bilayer Membranes on Titanium Oxide Surfaces: A Comparison of One- and Two-Tail SAM Molecules
Source: MDPI journal article supplement (doi:10.3390/nano12071153), 2022-03-30
Supplement: s1 [file s1]

# Streamlined Fabrication of Hybrid Lipid Bilayer Membranes on Titanium Oxide Surfaces: A Comparison of One- and Two-Tail SAM Molecules

Tun Naw Sut <sup>1,†</sup>, Sue Woon Tan <sup>1,†</sup>, Won-Yong Jeon <sup>1</sup>, Bo Kyeong Yoon <sup>2,\*</sup>, Nam-Joon Cho <sup>3,\*</sup> and Joshua A. Jackman <sup>1,\*</sup>

<sup>1</sup> School of Chemical Engineering and Translational Nanobioscience Research Center, Sungkyunkwan University, Suwon 16419, Korea; [suttunnaw@skku.edu](mailto:suttunnaw@skku.edu) (T.N.S.); [suewoon4695@gmail.com](mailto:suewoon4695@gmail.com) (S.W.T.); [powerwy@skku.edu](mailto:powerwy@skku.edu) (W.-Y.J.)

<sup>2</sup> School of Healthcare and Biomedical Engineering, Chonnam National University, Yeosu 59626, Korea

<sup>3</sup> School of Materials Science and Engineering, Nanyang Technological University, 50 Nanyang Drive, Singapore 637553, Singapore

\* Correspondence: [bkyoon@jnu.ac.kr](mailto:bkyoon@jnu.ac.kr) (B.K.Y.); [njcho@ntu.edu.sg](mailto:njcho@ntu.edu.sg) (N.-J.C.); [jjackman@skku.edu](mailto:jjackman@skku.edu) (J.A.J.)

† These authors contributed equally to this work.

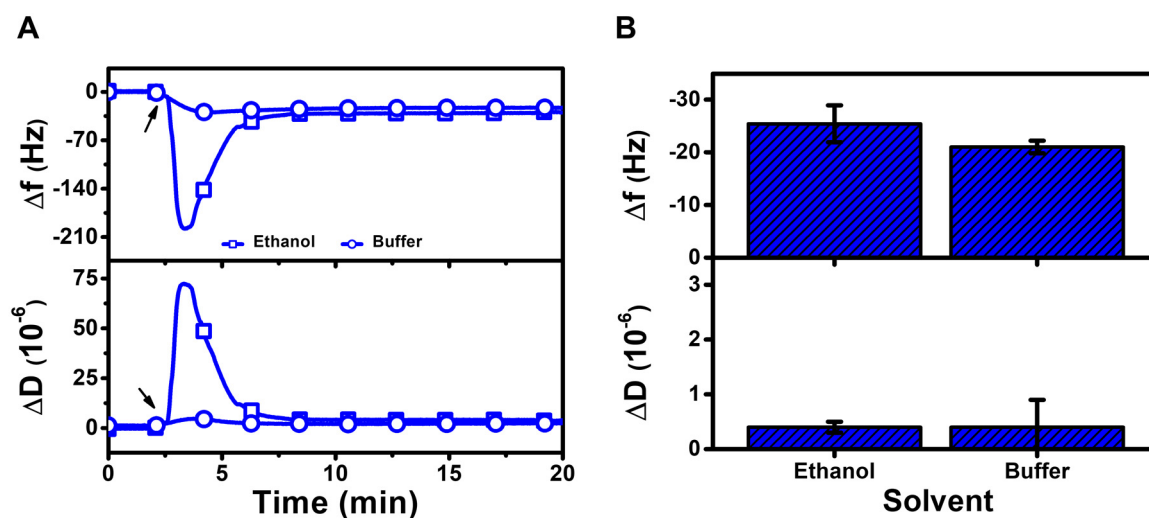

**Figure S1.** Magnified view for initial molecular deposition processes of DOCP lipid on TiO<sub>2</sub> surface in ethanol and buffer. (A) Time-resolved QCM-D  $\Delta f$  and  $\Delta D$  signals are reported for DOCP deposition in ethanol and buffer solution. The arrows indicate the start of DOCP addition. (B) Summary of final  $\Delta f$  and  $\Delta D$  shifts for molecular deposition in ethanol and buffer conditions corresponding to data in panel (A). The data are presented as the mean  $\pm$  standard deviation from  $n = 3$  runs.

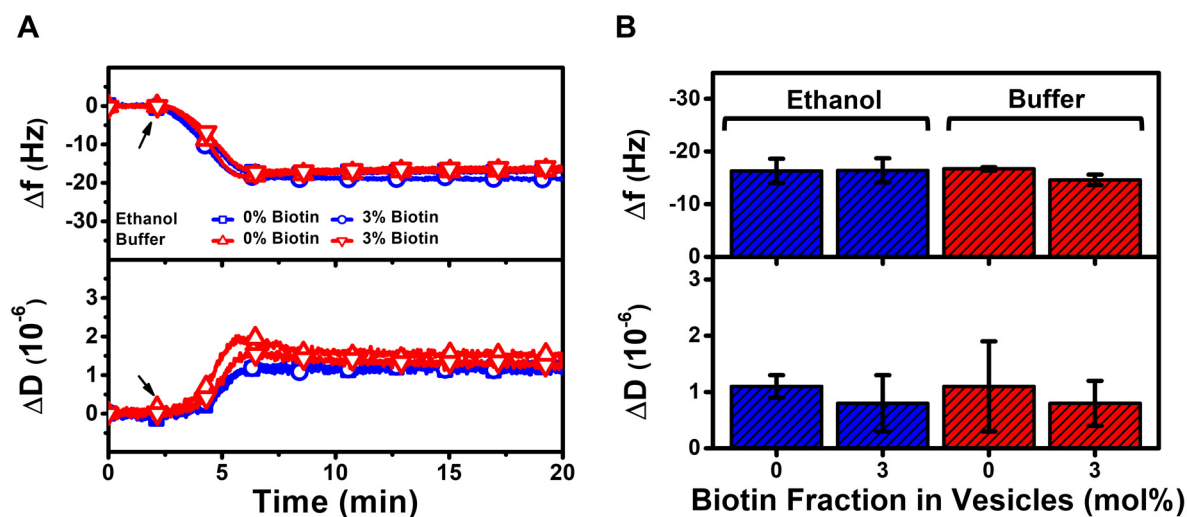

**Figure S2.** QCM-D tracking of vesicle adsorption and HLB formation on DOCP-functionalized  $\text{TiO}_2$  surfaces in different solvent systems. (A) Time-resolved  $\Delta f$  and  $\Delta D$  signals are reported for adsorption of vesicles containing 0 or 3 mol% biotinylated lipid onto  $\text{TiO}_2$  surfaces functionalized with DOCP molecules in ethanol and buffer solution. The arrow indicates the start of vesicle addition. (B) Summary of final  $\Delta f$  and  $\Delta D$  shifts for vesicle adsorption corresponding to data in panel (A). The data are presented as the mean  $\pm$  standard deviation from  $n = 3$  runs.
